# Supplementary material
Source: MDPI journal article supplement (https://www.mdpi.com/2073-4344/13/10/1377)
Supplement: s1 [file s1]

## Supplementary Materials

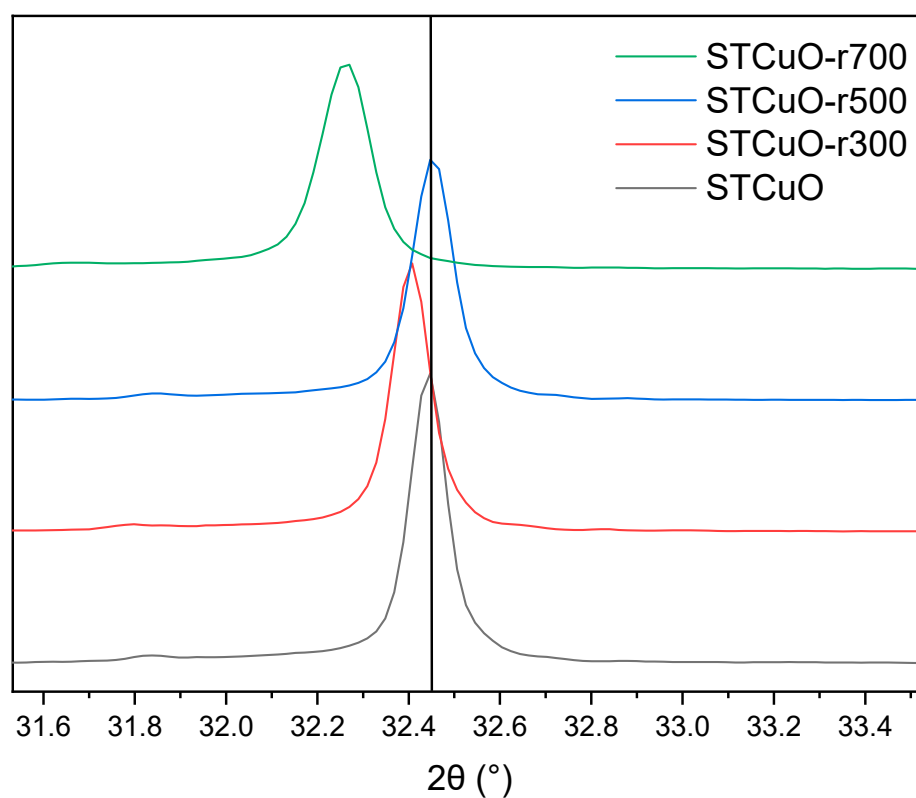

**Figure S1.** XRD enlargement of various Cu-doped samples. A significant shift can be observed in STCuO-r700, corresponding to Cu incorporation as the result of Ti reduction: a cell expansion is caused by  $\text{Ti}^{3+}$  formation, that further leads to the diffusion of  $\text{Cu}^{2+}$  ions in the bulk.

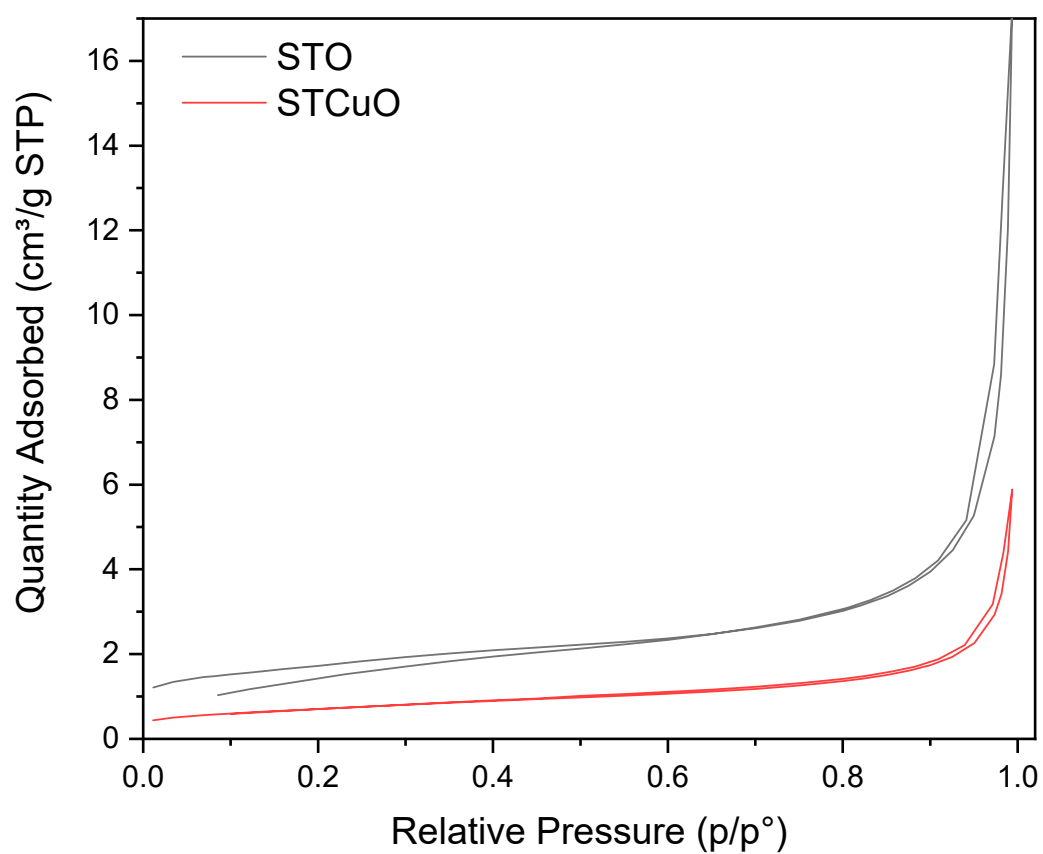

**Figure S2.** N<sub>2</sub> adsorption-desorption isotherms analyzed with BET method for STO (black) and STCuO (red).

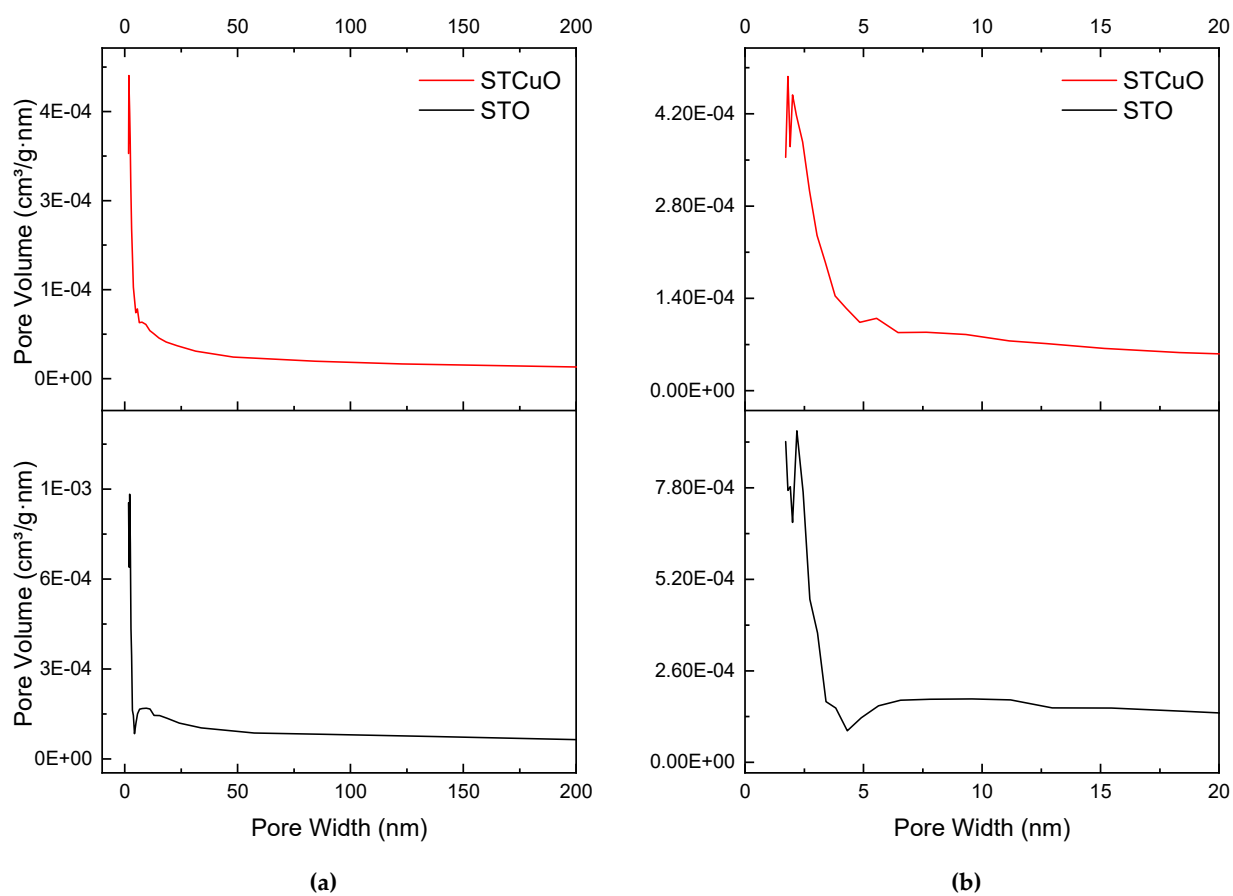

**Figure S3.** Pore Volume/Pore width curve for STO and STCuO (a), with an enlargement at low dimensions (b).

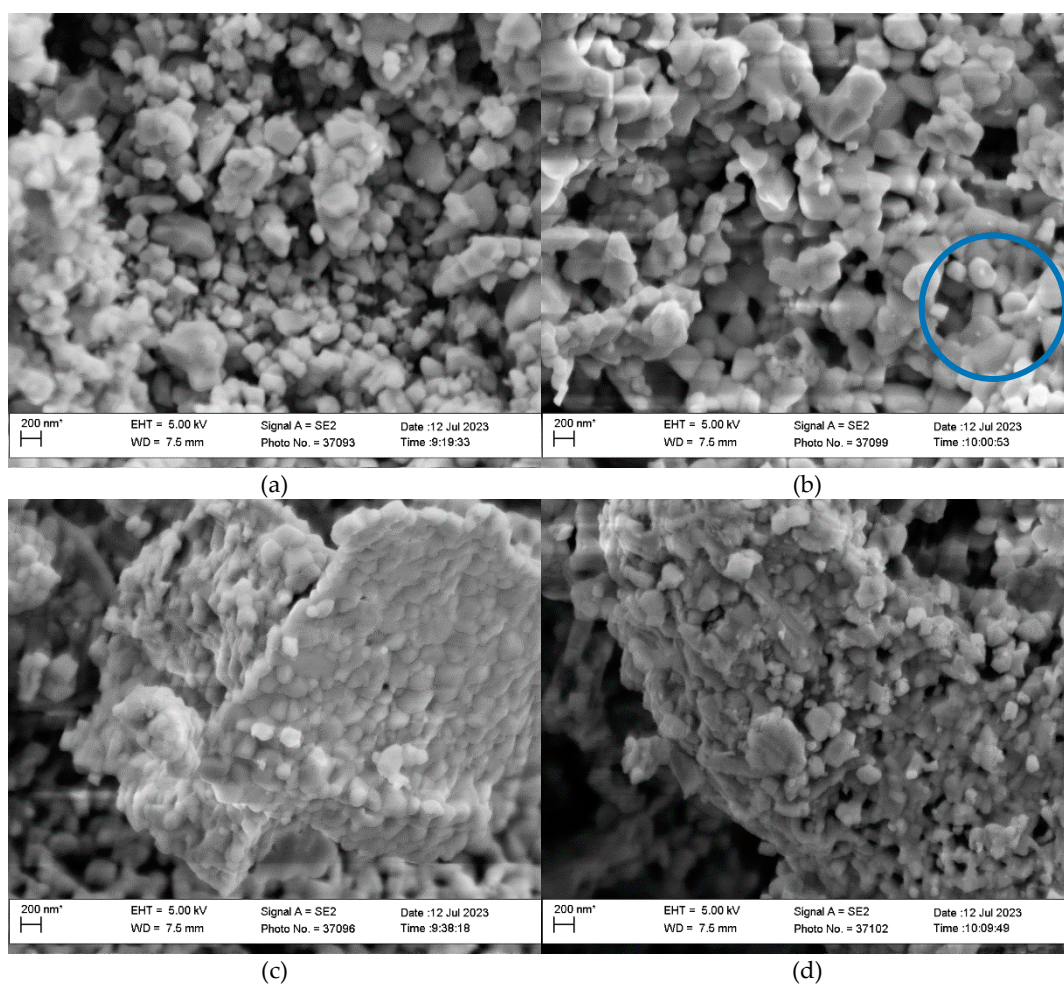

**Figure S4.** SEM images of as prepared STCuO (a) and reduced samples: STCuO-r300 (b), STCuO-r500 (c) and STCuO-r700 (d); a progressive change in morphology is observed, with grain growth and a porosity decrease. For STCuO.r300, the presence of nanoparticles, ascribed as Cu aggregates, is observed (in circle).

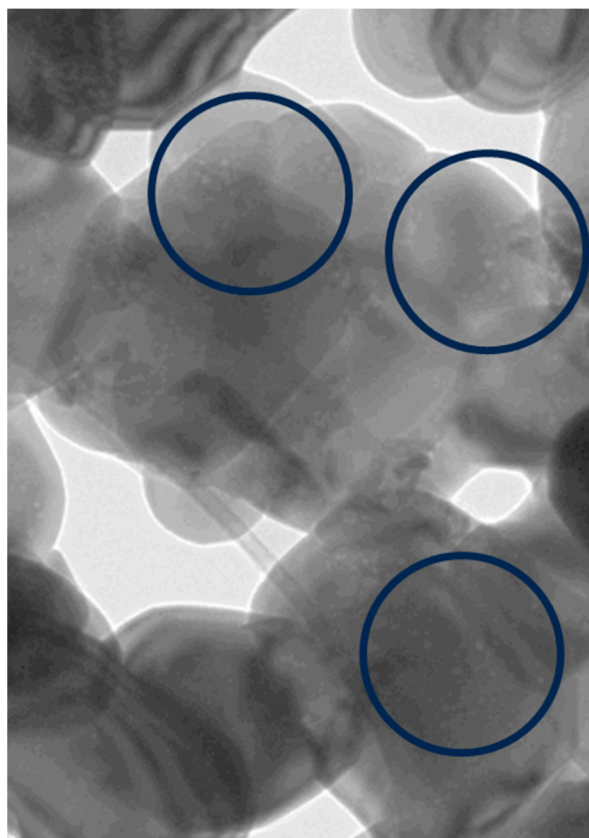

**Figure S5.** Enlargement of TEM image of STCuO-r300. Small nanoparticles can be observed, ascribed as Cu nanoparticles on the perovskite grains.

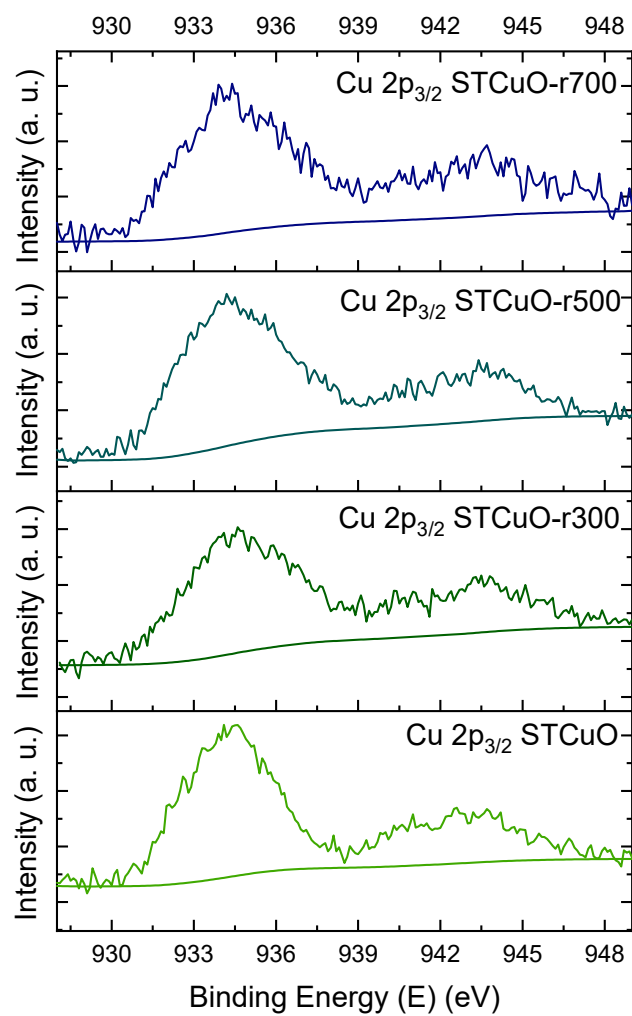

**Figure S6.** High resolution XPS spectra of Cu 2p<sub>3/2</sub> region.

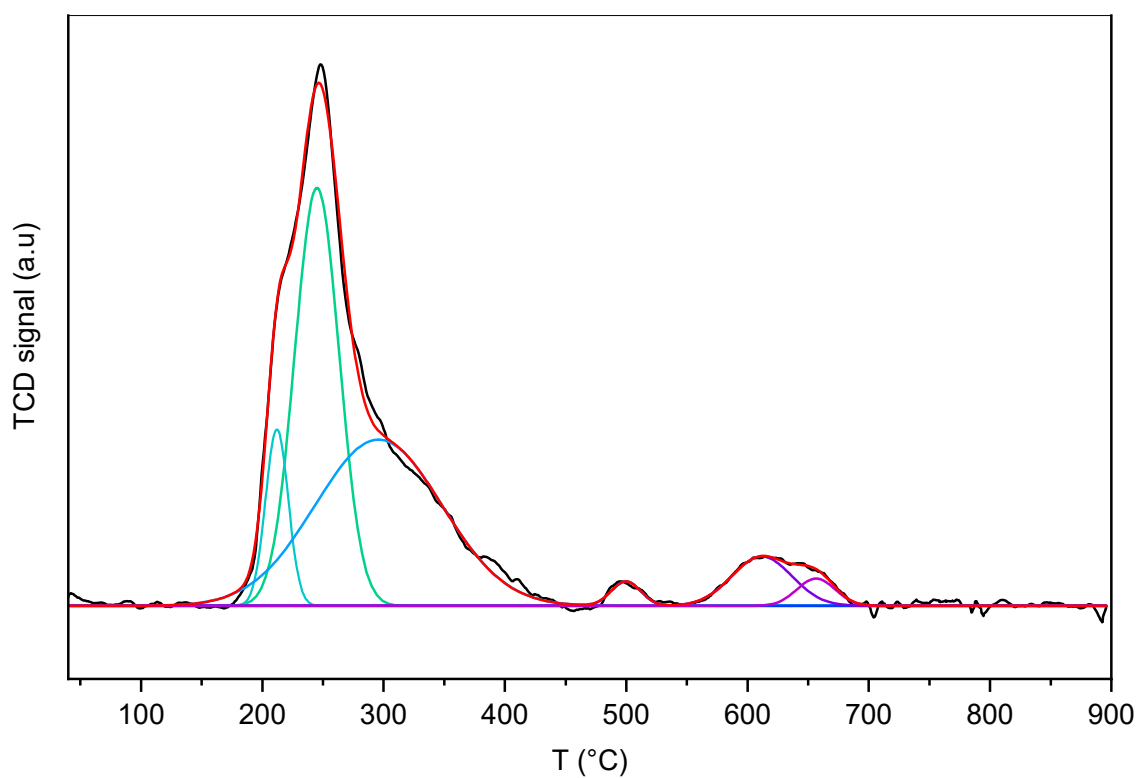

Figure S7. Peak fit of STCuO H<sub>2</sub>-TPR.

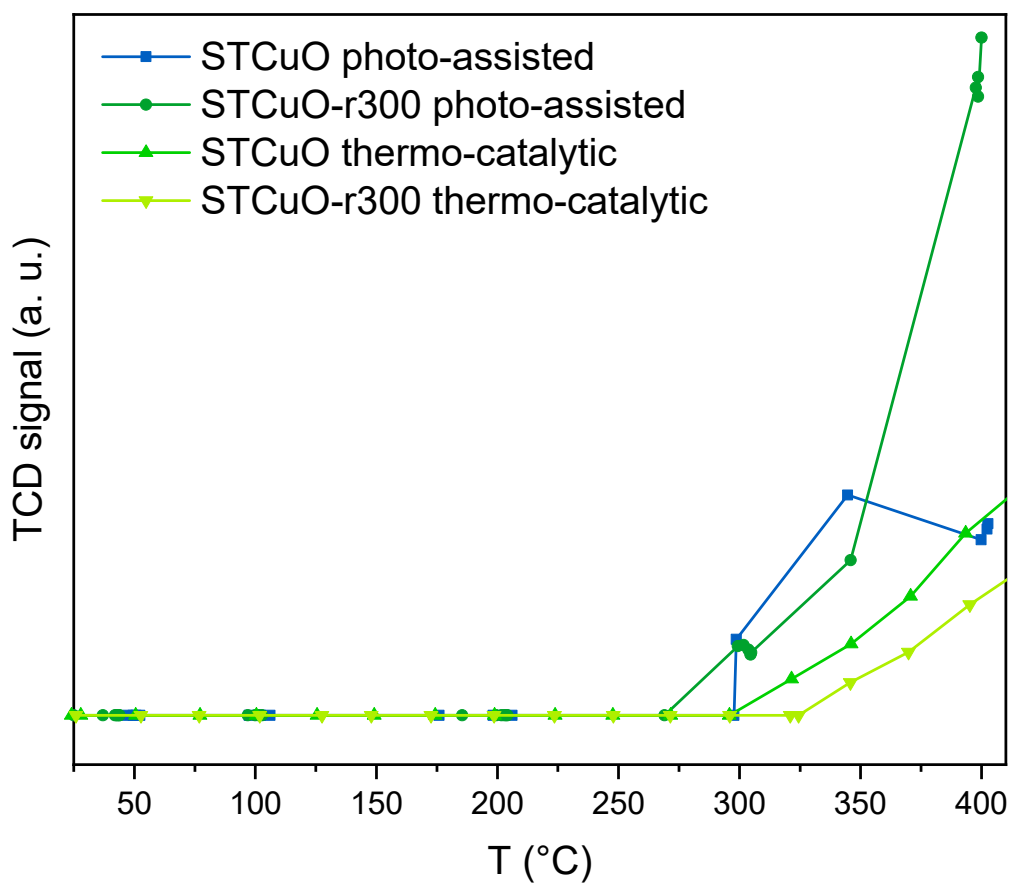

Figure S8. CO production in STCuO and STCuO-r300 both in dark and photo-assisted conditions.

**Table S1.** Surface elemental composition of the samples discussed in this work.

| Sample     | Element |       |       |      |
|------------|---------|-------|-------|------|
|            | O       | Ti    | Sr    | Cu   |
| STO        | 66.17   | 18.61 | 15.22 | -    |
| STCuO      | 64.51   | 16.43 | 14.92 | 4.14 |
| STCuO-r300 | 66.68   | 15.14 | 14.06 | 4.02 |
| STCuO-r500 | 65.53   | 16.53 | 14.33 | 3.61 |
| STCuO-r700 | 67.83   | 14.79 | 17.31 | 2.17 |
